1  
2 **Laminar Segregation of Sensory Coding and Behavioral**  
3 **Readout in Macaque V4**

4  
5  
6 **Warren W. Pettine<sup>1</sup>, Nicholas A. Steinmetz<sup>2</sup>, Tirin Moore**

7  
8  
9 **Department of Neurobiology and Howard Hughes Medical Institute, Stanford**  
10 **University School of Medicine, Stanford CA 94305**

11  
12  
13 **Correspondence to:**  
14 **Tirin Moore**  
15 **Department of Neurobiology, Fairchild Bldg., Campus Drive West**  
16 **Stanford University, Stanford CA, 94305**

17  
18  
19  
20 **1,975 Words (main text)**  
21 **3 Figures**

22  
23 1. Current address: Center for Neural Science, New York University, 4 Washington Pl  
24 #809, New York, NY 10003

25 2. Current address: University College, London, The Cruciform Building, Gower Street,  
26 London WC1E 6AE

27  
28  
29 **Acknowledgements.**

30 This work was supported by NEI grant EY014924 to T.M., a National Science  
31 Foundation graduate fellowship to N.A.S., and an HHMI medical research fellowship to  
32 W.W.P. We thank S. Hyde for valuable assistance with animal care, and B. Schneeweis  
33 for designing and building the 3D electrode angler.

34  
35

36  
37

## 38 **Summary**

39 Neurons in sensory areas of the neocortex are known to represent information both about  
40 sensory stimuli and behavioral state, but how these two disparate signals are integrated across  
41 cortical layers is poorly understood. To study this issue, we measured the coding of visual  
42 stimulus orientation and of behavioral state by neurons within superficial and deep layers of  
43 area V4 in monkeys while they covertly attended or prepared eye movements to visual stimuli.  
44 We show that single neurons and neuronal populations in superficial layers convey more  
45 information about the orientation of visual stimuli, whereas single neurons and neuronal  
46 populations in deep layers convey greater information about the behavioral relevance of those  
47 stimuli. In particular, deep layer neurons encode greater information about the direction of  
48 prepared eye movements. These results reveal a division of labor between laminae in the  
49 coding of visual input and visually guided behavior.

50  
51  
52  
53

## 54 **Introduction**

55 Visual area V4 comprises an intermediate processing stage in the primate visual hierarchy<sup>1,2</sup>.  
56 V4 neurons exhibit selectivity to color<sup>3,4</sup>, orientation<sup>5,6</sup>, and contour<sup>7,8</sup>, and appear to be  
57 segregated according to some of these properties across the cortical surface<sup>9</sup>. Distinct from  
58 their purely sensory properties, V4 neurons are also known to encode information about  
59 behavioral and cognitive factors, particularly covert attention<sup>10</sup>, but also reward value<sup>11</sup>, and the  
60 direction of planned saccadic eye movements<sup>12-14</sup>. As with other neocortical areas, V4 is  
61 organized by a characteristic laminar structure, in which granular Layer 4 neurons receive  
62 feedforward sensory input from hierarchically 'lower' visual cortical areas, namely area V1 and  
63 V2<sup>1,15-17</sup>. Projections from area V4 to hierarchically 'higher' visual areas, such as TEO and  
64 posterior inferotemporal (IT) cortex, originate largely from layers II-III<sup>1,18</sup>, whereas layer 5  
65 neurons project back to V1 and V2 and subcortically to the superior colliculus<sup>18-20</sup>.

66 Recent studies have found laminar differences in attention-related modulation of neural  
67 activity. Buffalo et al., (2011)<sup>21</sup> observed that changes in LFP power due to the deployment of  
68 covert attention differed between superficial and deep layers; gamma-band increases were  
69 found in superficial layers and alpha-band decreases were found in deep layers. Increases in  
70 firing rate with attention were observed to be similar in both laminar divisions. Nandy et al.  
71 (2017)<sup>22</sup> compared attention-driven changes in spiking activity across three laminar  
72 compartments of V4 and observed significant firing rate modulation in superficial, granular and  
73 deep layers. In addition, they observed subtle, but reliable, differences in other aspects of  
74 activity across layers (e.g. spike count correlations). However, no previous studies have  
75 compared stimulus tuning properties, or looked for differences in other types of behavioral  
76 modulation across layers.

77 To investigate the layer dependence of stimulus and behavioral modulation in area V4,  
78 we measured the selectivity of V4 neurons to both factors in monkeys performing an attention-

79 demanding task that dissociated covert attention from eye movement preparation. We then  
80 compared orientation tuning and behavioral modulation in superficial and deep layer individual  
81 units, and populations.

82

## 83 **Results and Discussion**

84 Two monkeys (G and B) were trained to perform an attention-demanding task<sup>23</sup> that required  
85 them to detect orientation changes in one of four peripheral oriented grating stimulus patches  
86 while maintaining central fixation (Figure 1a; see Experimental Procedures)<sup>12</sup>. Upon detection of  
87 a change, monkeys were rewarded for saccadic eye movements to the patch opposite the  
88 orientation change. Both monkeys performed well above chance. We recorded the activity of  
89 698 units (277 single-units and 421 multi-units) at 421 sites using 16-channel linear array  
90 electrodes while monkeys performed the task. Electrodes were delivered perpendicular, or  
91 nearly perpendicular, to the cortical surface as guided by magnetic resonance imaging, and  
92 confirmed by receptive field (RF) alignment (Figure 1b). In each recording session, data from  
93 the 16 electrode channels were assigned laminar depths, relative to a common current source  
94 density (CSD) marker (Figure 1c, see Methods).

95

### 96 **Orientation Selectivity**

97 We first examined the proportion of units exhibiting significant orientation tuning and compared  
98 that proportion across layers (see Methods). Overall, 63.75% (445/698;  $P < 0.001$ ) of units were  
99 significantly tuned for stimulus orientation (Figure 2a). Of these, we found that a significantly  
100 higher proportion of superficial units (74.9%) were tuned compared to deep units (58.3%; Chi-  
101 squared,  $P = 9.7 \times 10^{-6}$ ). Next, we fit Gaussian functions to the normalized mean firing rates  
102 elicited by the eight orientations for each of the 698 units (Figure 2b, see Methods). Across  
103 superficial and deep layers, 35.5% (248) of units were well-fit ( $R^2 > 0.7$ ). Among the well-fit

104 units, 98 were recorded in superficial layers (36.6% of superficial units) and 150 were recorded  
105 in deep layers (35% of deep neurons). These proportions were not significantly different from  
106 each other (Chi-squared,  $P > 0.05$ ). Comparing fit parameters, we observed no significant  
107 differences in width or baseline between superficial and deep layers (width, superficial = 0.84,  
108 deep = 0.67,  $P > 0.05$ ; baseline, superficial = 0.10, deep = 0.10,  $P > 0.05$ ). However, the mean  
109 amplitude of superficial layer units was significantly greater than that of deep layer units  
110 (superficial = 0.17; deep = 0.13;  $P = 0.0179$ ).

111         Measurements of orientation tuning in individual units indicate that superficial layer units  
112 in our dataset were better tuned to stimulus orientation than their deep layer counterparts.  
113 However, we considered that these measurements might not capture all of the information  
114 conveyed about stimulus orientation. We therefore took a population decoding approach<sup>24</sup> to  
115 measure the information available about orientation in the activity of all units within superficial or  
116 deep layers (see Methods). Decoder performance was computed as a function of neuronal  
117 population size. We then fit a “neuron-dropping” curves (NDCs)<sup>25</sup> to the values, and compared  
118 the confidence intervals of the fit parameters for slope (b) and asymptote (c) for superficial and  
119 deep populations. Both superficial and deep units performed significantly above chance for all  
120 population sizes greater than zero. The NDS curve for superficial populations had a significantly  
121 greater slope (superficial  $b = 0.03071$ , 95% CI: 0.03002, 0.0314; deep  $b = 0.01976$ , 95% CI:  
122 0.01925, 0.02026), and asymptotic performance was about 7% higher than deep units  
123 (superficial,  $c = 0.9622$ , 95% CI: 0.9597, 0.9647; deep,  $c = 0.8969$ , 95% CI: 0.8931, 0.9008).  
124 Thus, as with the single-unit analysis, we found that stimulus orientation was more accurately  
125 encoded by populations of superficial layer neurons.

126         The robust differences in orientation selectivity we observed between the superficial and  
127 deep layer units raise important questions, such as whether those differences result simply from  
128 the known compartmentalization of orientation versus color tuning across V4<sup>9</sup>. However, even if  
129 we had oversampled one compartment or the other (e.g. more color compartments), doing so

130 would not be expected to introduce an overall bias between upper and lower layers. It is also  
131 worth noting that since the primary evidence of feature-specific compartments in V4 comes from  
132 optical imaging, where much of the signal derives from superficial layers<sup>26</sup>, those compartments  
133 may be less well-defined within infragranular layers. Indeed, anatomical evidence indicates that  
134 intrinsic horizontal connections in V4, which appear to reciprocally connect columns across  
135 millimeters of cortex, exist predominantly in superficial layers, similar to earlier (e.g., V1, V2)  
136 and later stages of visual cortex<sup>27</sup>.

137         Second, our results raise the important question of whether the selectivity to other  
138 features, e.g. color or contour, is also greater in superficial layers. For example, substantial  
139 previous evidence suggests that neurons in V4 are unique in the computation of stimulus  
140 contour, not orientation, the former deriving from the orientation-specific input they receive from  
141 V1 and V2<sup>7,8,28,29</sup>. In such a case, our observations within orientation selectivity might not  
142 generalize to all other types of selectivity. Instead, the results might only generalize to features  
143 computed at earlier stages. Nonetheless, our results reveal the importance of assessing the  
144 laminar dependence of stimulus selectivity across visual cortex.

145

### 146 **Coding of Eye Movement Preparation and Covert Attention**

147 We next examined activity across superficial and deep layers when monkeys covertly attended  
148 the visual stimulus, prepared a saccade to that stimulus, or ignored it. We first compared the  
149 average modulation for individual neuronal recordings made at varying laminar depths aligned  
150 to the superficial/deep boundary (Figure 3A). Overall, modulation across depth was significantly  
151 greater during eye movement preparation than during covert attention ( $P = 0.0024$ ), a result we  
152 reported previously<sup>10</sup>. However, we observed no significant main effect of depth ( $P > 0.05$ ), or  
153 an interaction of attention type and depth ( $P > 0.05$ ). Nonetheless, movement-related  
154 modulation appeared to peak within the deep layers, suggesting that the difference in attention  
155 type was due to greater eye movement modulation in those layers. Thus, we directly compared

156 the magnitude of modulation in the two attention types collapsed within superficial or deep  
157 layers. This revealed that while there was no significant difference in modulation in superficial  
158 layers ( $P > 0.05$ ), saccade modulation was significantly greater within deep layers ( $P = 0.0041$ ).

159 Next, as with stimulus orientation, we decoded the behavioral condition using population  
160 activity from superficial (277 units) or deep (419 units) layers (Figure 3b), and classified activity  
161 as occurring during covert attention, saccade preparation, or control trials. The performance of  
162 decoding deep populations was significantly greater than superficial at all populations of  $>30$   
163 units. Although the slopes of the NDS fits were not significantly different, (superficial  $b =$   
164  $0.01918$ , 95% CI:  $0.01842$ ,  $0.01993$ ; deep  $b = 0.01849$ , 95% CI:  $0.01773$ ,  $0.01925$ ), the  
165 asymptotic performance for deep units exceeded that of superficial units by more than 5%  
166 (superficial,  $c = 0.6073$ , 95% CI:  $0.6053$ ,  $0.6092$ ; deep,  $c = 0.6534$ , 95% CI:  $0.6509$ ,  $0.6559$ ).  
167 Thus, the behavioral condition was more accurately encoded by populations of deep layer units.

168 To investigate the conditions driving performance, we then conducted pairwise decoding  
169 of attentional conditions (Figure 3c). When decoding covert attention versus control, we found  
170 that although the NDC slope for deeper populations was greater than that of superficial  
171 populations, (superficial  $b = 0.01974$ , 95% CI:  $0.01882$ ,  $0.02066$ ; deep  $b = 0.02671$ , 95% CI:  
172  $0.0255$ ,  $0.02792$ ), asymptotic performances were not significantly different (superficial,  $c =$   
173  $0.7565$ , 95% CI:  $0.7544$ ,  $0.7586$ ; deep,  $c = 0.758$ , 95% CI:  $0.7564$ ,  $0.7596$ ). In decoding  
174 saccade preparation versus covert attention, we found a greater slope for superficial layer units,  
175 (superficial  $b = 0.01739$ , 95% CI:  $0.01646$ ,  $0.01832$ ; deep  $b = 0.01446$ , 95% CI:  $0.01361$ ,  
176  $0.01531$ ), but a greater asymptotic performance for deep layer populations (superficial,  $c =$   
177  $0.7475$ , 95% CI:  $0.7448$ ,  $0.7503$ ; deep,  $c = 0.7785$ , 95% CI:  $0.7745$ ,  $0.7825$ ). Lastly, when  
178 decoding saccade preparation versus control, we found that although the slopes were not  
179 significantly different, (superficial  $b = 0.02765$ , 95% CI:  $0.02639$ ,  $0.02891$ ; deep  $b = 0.0286$ ,  
180 95% CI:  $0.02714$ ,  $0.03006$ ), the asymptotic performance was  $\sim 3\%$  greater for deep units  
181 (superficial,  $c = 0.7295$ , 95% CI:  $0.7282$ ,  $0.7308$ ; deep,  $c = 0.7651$ , 95% CI:  $0.7634$ ,  $0.7668$ ).

182 Thus, coding of attentional state, covert or overt, was greatest for units in the deep layers,  
183 where eye movement preparation was most strongly encoded.

184 Few studies have examined the influence of motor preparation on the responses of  
185 neurons in visual cortex, yet it is nonetheless clear that visually driven activity is affected by  
186 impending eye movements at many stages of the primate visual system<sup>30–33</sup>. Moreover, we have  
187 shown previously<sup>12</sup>, and in the present study, that the movement-related modulation of V4  
188 activity is not only dissociable from modulation by covert attention, but it is more reliable. Those  
189 findings are consistent with the hypothesis that visual cortical areas contribute directly to visually  
190 guided saccades, particularly the refinement of saccadic plans according to features coded by  
191 particular visual areas (e.g. shape in area V4)<sup>34–36</sup>.

192 Our observation of stronger eye movement-related modulation in deep layers is also  
193 consistent with the fact that projections to the superior colliculus emanate principally from layer  
194 V pyramidal neurons throughout extrastriate visual cortex<sup>37</sup>. Moreover, deep layer neurons are  
195 a major source of feedback projections<sup>1</sup>, and thus the relative robustness of behavioral signals  
196 within deep layers may reflect the projection of those signals to earlier stages of visual  
197 processing. Consistent with this notion, a previous study of attentional effects in areas V1, V2  
198 and V4 found evidence of a “backward” progression of modulation in these areas that begins in  
199 V4 and proceeds to V1<sup>21</sup>. Thus, the unique contributions of deep layer neurons to oculomotor  
200 output and in top-down influences may account for their superior coding of behavioral variables.

201

## 202 **Conclusion**

203 We observed significantly greater orientation selectivity among units within the superficial layers  
204 of V4 using both tuning measures in single neurons and decoding of population activity. In  
205 contrast, using both single-unit and population activity, we observed that deeper layers  
206 conveyed more information about the behavioral relevance of visual stimuli. In particular, we



207 found that neurons within deep layers conveyed more information than superficial neurons  
208 about the planning of saccadic eye movements. These results suggest a division of labor  
209 between superficial and deep layer neurons in the feedforward processing of stimulus features  
210 and the application of sensory information to behavior.

211

212

## 213 **Methods**

### 214 **Subjects, Behavioral task, Visual Stimuli and Neuronal Recordings**

215 Details of the subjects, the task, the stimuli and recording techniques are described in <sup>12</sup>. In  
216 brief, two male rhesus macaques were surgically implanted with recording chambers. Monkeys  
217 were trained on an attention task that dissociated covert attention from saccade preparation.  
218 Trials were initiated when the monkey fixated a central point. After 100 ms of central fixation, a  
219 300-500ms “stimulus epoch,” occurred, where four oriented Gabor patches appeared at four  
220 locations equidistant from the fixation point. This was followed by the “cue epoch,” lasting 600-  
221 2,200 ms. During this epoch, a line appeared near the central fixation point, directed toward one  
222 of the Gabor patches, indicating that it would potentially change orientations. After a variable  
223 interval, the array of stimuli disappeared briefly (270 ms) and then reappeared. Monkeys were  
224 trained to detect changes in orientation of any of the four stimuli upon reappearance. To  
225 dissociate the direction of covert attention from that of saccade preparation, monkeys were  
226 given a reward for responding to an orientation change with a saccade to the stimulus opposite  
227 the changed stimulus (i.e. antisaccade). If no change occurred at the cued location (50% of  
228 trials), the monkey was rewarded for maintaining fixation. Monkey G correctly responding on  
229 69% of trials (77%, change trials; 62%, catch trials) and Monkey B correctly responding on 67%  
230 of trials, (62%, change trials; 70%, catch trials).

231       Electrophysiological recordings were made from area V4 on the surface of the prelunate  
232 gyrus with 16-channel, linear array U-Probes (Plexon, Inc., Dallas, TX). Electrodes were  
233 cylindrical in shape (180  $\mu$ m diameter) with a row of 16 circular platinum/iridium electrical  
234 contacts (15  $\mu$ m diameter) at 150  $\mu$ m center-to-center spacing (total length of array = 2.25 mm).  
235 Recorded waveforms were classified as either “single neurons,” (277) or multi-neuron clusters  
236 (421). We use “units,” to refer to activity of both types.

237

## 238 **Cortical Column Laminar Recordings**

239

### 240 ***Electrode targeting: Use of MRI guidance to achieve perpendicularity***

241 We sought to achieve simultaneous recordings at sites located within a single cortical "column."  
242 In particular, the topographic organization of extrastriate visual cortex suggests that vertically  
243 separated neurons should have overlapping RFs, so we sought to record from a column  
244 principally by this definition. Since the cortical magnification factor (an estimate of how much  
245 cortical tissue corresponds to units of retinal space) is approximately  $1 \text{ deg/mm}^{38}$ , we could  
246 measure the approximate angle with the cortex by the distance between receptive fields  
247 measured on the deepest and most superficial recording contacts, and sought to keep this  
248 angle at 10 degrees or less, corresponding to a RF shift of  $\sim 0.5$  degrees, given 2 mm thickness  
249 of cortex.

250 In order to achieve these perpendicular penetrations we employed an MRI targeting  
251 technique<sup>39</sup>. We implanted the monkeys with custom built recording chambers made from  
252 PEEK-type plastic, rather than from titanium, to avoid "shadows" in the MRI images. While we  
253 did not employ ceramic skull screws, we took some care to ensure that the titanium skull screws  
254 and plates were not located close to the recording chamber and brain areas of interest. We filled  
255 a custom-made plastic cylinder with copper sulfate solution. We anesthetized the monkey and  
256 inserted this cylinder into the recording chamber, into which it fit snugly. We performed  
257 structural MRI imaging (1.5 Tesla; T-1 weighted image) to visualize the location and orientation  
258 of the recording chamber (visible due to the high-contrast copper sulfate solution within it)  
259 relative to the position of the prelunate gyrus within the brain. By manually identifying the  
260 contours of the prelunate gyrus, we could compute perpendicular vectors to it and project these  
261 back to the level of the electrode stage, thus identifying which penetration approach vectors  
262 were likely to yield perpendicular penetrations.

263

264 ***Achieving desired approach vectors***

265 We employed a custom-built targeting device to angle and rotate the electrode into any desired  
266 orientation and position in three dimensions. The device consisted of a “double-eccentric”  
267 mechanism for positioning the electrode in the x-y plane of the well, a tilting mechanism, and a  
268 rotating mechanism. All four coordinates could be set with sub- millimeter precision using  
269 notches engraved in the device. The V4 recording chambers on both monkeys projected from  
270 the monkeys’ heads at an angle such that there was a unique point on the chamber’s perimeter  
271 at the lowest elevation. This point was identified computationally in the MRI images and was  
272 identified on the chamber itself by filling the chamber with saline solution until the liquid first  
273 contacted the lip of the chamber. With this point of alignment between the MRI images and the  
274 physical well, the exact X, Y, tilt, and rotation coordinates for an approach vector specified by  
275 the MRI images were geometrically determined.

276

277 ***Electrode targeting: Assessing perpendicularity with RF overlap***

278 RF positions and extents were estimated by computing the number of multi-unit spikes recorded  
279 on each channel in the 200ms period following stimulus onset for each of probe location in a  
280 RF-mapping task. During this task, subjects fixated a small (~0.3 d.v.a.) white dot against a  
281 medium gray background. On each trial the six flash positions were selected from one of the  
282 rows of the grid in random order. A horizontally oriented grating was flashed for 50 ms at each  
283 position, with a 150-250ms variable delay between flashes. The flashes occurred at a total of 36  
284 locations on a 6x6 grid with 3 d.v.a. spacing (total coverage 15x15 d.v.a.). If the subject  
285 maintained fixation within a 1.8 d.v.a. square window until after the sixth flash, he received a  
286 juice reward.

287         The upper right position of the grid was at the fovea such that only the lower left visual  
288 field was covered by the mapping. This 6x6 matrix of response counts was cubic spline  
289 interpolated to produce the full “RF map” and a 75%-of-max contour was determined, defining

290 the RF border. The center of mass of the portion of the RF map within the RF border was  
291 defined as the RF center. This analysis was performed after recording RF-mapping task  
292 responses but before the change-detection task, so that a stimulus position could be chosen at  
293 a location that fell within the RF borders for all channels. If such a position was found, the  
294 recording was included in further analyses.

295

### 296 ***Electrode targeting: Depth alignment***

297 We lowered electrodes into the brain rapidly ( $\sim 25\mu\text{m}/\text{sec}$ ) until one channel was in the cortex,  
298 based on visual examination of LFP and spiking activity being recorded concurrently. Then we  
299 advanced the electrode slowly ( $\sim 5\mu\text{m}/\text{sec}$ ) until the uppermost electrode contact was near the  
300 point of entering the brain, being recorded during advancement. We withdrew the electrode  
301  $500\mu\text{m}$  to release compression of the brain caused by the electrode. During this brief  
302 withdrawal, no apparent change in the LFP or spiking activity was observed, confirming that this  
303 served to relax the cortex rather than change the position of the electrode relative to the brain.  
304 This manipulation qualitatively improved stability and recording quality. After reaching this  
305 position, the full-field flash task was run to assess the depth.

306 During the full-field flash task, monkeys fixated a small ( $\sim 0.3$  d.v.a.) white dot against a  
307 black background. The monitor turned maximal white for one frame ( $\sim 8\text{ms}$ ) then back to black.  
308 The flash occurred six times per trial with variable delays in the range of 150-250ms. If the  
309 monkey maintained fixation within a 1.8 d.v.a. square window until after the sixth flash, he  
310 received a juice reward. Approximately 30 trials, or 180 flashes, were completed per day. We  
311 computed the current source density (CSD) response to the full-field flashes. The CSD reflects  
312 the spatial and temporal position of current sources and sinks (i.e. where current flows into and  
313 out of the extracellular space, respectively) along the length of the electrode, given certain  
314 assumptions likely to be true for our recordings (Mitzdorf, 1985). The CSD can be computed  
315 discretely as the second spatial derivative of the LFP for each point in time, that is:

316

$$D(z) = \frac{\phi(z+h) - 2\phi(z) + \phi(z-h)}{h^2}$$

317

318 where  $z$  is the position in depth,  $h$  is the distance between potential measurements (in  
319 our case, 150 $\mu$ m), and  $\phi(z)$  is the potential measured as a function of depth. We also  
320 calculated the CSD according to the inverse estimation method<sup>40</sup>, and display the results of this  
321 calculation, which produces smoother, higher resolution plots of CSD, in figures for clarity.  
322 However, results were qualitatively indistinguishable with both methods. Borders between  
323 current sinks of interest were manually identified and channel depths were computed, in mm,  
324 relative to these borders.

325

### 326 ***Depth registration***

327 In all included recordings, a prominent current sink was identified near the middle of the  
328 electrode, approximately 40-50ms after flash onset. This was often followed by another sink just  
329 below the first, peaking approximately 100ms after flash onset. These two sinks appeared in  
330 every included recording, and we therefore aligned the recordings on these functional markers  
331 of cortical laminae. In many recordings, further sinks were observed near the top of the probe at  
332 ~150ms and near the bottom of the probe at ~50ms. Because the widths of all four of these  
333 sinks, when present, were highly consistent from recording to recording, we assigned each  
334 channel a depth relative to this central feature.

335 Depths were measured in millimeters, and positive depths indicate channels superficial  
336 relative to the CSD feature. In some sessions, further CSD recordings at deeper locations  
337 revealed that no further current sources or sinks of comparable magnitude could be identified  
338 below these CSD features, assuring us that our electrode covered the depth of cortex. Two  
339 alignments of these functionally defined layers with anatomical cortical layers seem possible.

340 The uppermost sink could correspond to layer 2/3 (together), and the larger sink to layer 4  
341 (Figure 1c). Alternately, the four visible sinks could correspond to layer 2, 3, 4, and 5 in order  
342 from superficial to deep. On the one hand, the first assignment seems reasonable as the  
343 thickness of the layers known histologically matches the thickness of these CSD features  
344 reasonably well, and our expectation from primary sensory areas is that layers 4 and 6 will have  
345 the earliest responses<sup>41-43</sup>. However, the cortex may well be compressed around the electrode  
346 as it is inserted thus skewing the measured layer thicknesses. Layer 2 and 3 are well-  
347 differentiated cytoarchitecturally in V4 unlike in V1, suggesting they may not appear as a single  
348 sink. Furthermore, the earliest driving visual inputs into V4 are probably not from the ventral  
349 stream<sup>44</sup>, which project into layer 4<sup>15</sup>, and may instead arrive from the pulvinar nucleus of the  
350 thalamus<sup>45,46</sup>, which synapses into deep layer 3<sup>47</sup> (Jones, 2007). This would indicate that the  
351 lower sink may correspond with the N95 marker used in previous studies to identify the granular  
352 layer<sup>42,48-50</sup>.

353

354

## 355 **Data Analysis**

356

### 357 ***Tuning and Modulation Indices***

358 To determine the tuning of each single neuron, we calculated the firing rate on each trial during  
359 a 300ms block, from 50ms to 350ms relative to stimulus onset. We then labeled the trials by  
360 stimulus orientation, and used a Kruskal-Wallis test to compare orientation distributions. If the  
361  $p < 0.001$ , we categorized the neuron as tuned. We then used a Chi-squared test to compare the  
362 proportion tuned in superficial versus deep layers. We also fit a Gaussian tuning function to the  
363 each neurons average firing rate for the eight stimuli using parameters for amplitude (a),  
364 preferred orientation (b), width (c) and baseline (d). The formula was given by:

365

$$r(\theta) = a \times e^{-((\theta-b)/c)^2} + d$$

366

367 To obtain the parameters and goodness of fit measures, we used the Matlab fit function with  
368 nonlinear least squares, and constraints of 0 for the lower bound of all variables, and an upper  
369 bound of  $\pi$  for  $b$  and 8 for  $c$ . To determine if the neuron was well fit by the function, we used an  
370 adjusted  $R^2$  cutoff of 0.70. For each neuron, the averaged firing rates were rotated around  $\pi$   
371 until the optimal fit was achieved. We then compared the function parameters of superficial and  
372 deep layer neurons. As the sample sizes of superficial and deep neurons were unequal, we  
373 used bootstrapping without replacement to match the sample sizes, and repeated each test  
374 1000 times. The reported p-values are the mean of those produced by a Wilcoxon signed-rank  
375 test.

376

### 377 **Attention Modulation**

378 For each neuronal unit, we calculated the mean firing rate during the cue epoch from -500ms to  
379 0ms relative to the blank period. For each unit, we then calculated the attention modulation  
380 indices for eye movement preparation and covert attention relative to the orthogonal control,  
381 using the standard formula:

382

$$Modulation\ Index = \frac{Attention - Orthogonal}{Attention + Orthogonal}$$

383

384 We then used a mixed effects model with fixed effects for neural depth, attention condition and  
385 an interaction term (implemented with the R package nlme<sup>51</sup>). To make layer comparisons  
386 within this omnibus model, we used three orthogonal contrasts: superficial attention conditions,  
387 deep attention conditions and superficial neuronal units versus deep neuronal units. In all tests,  
388 we included a random intercept for each neuronal unit, to control for repeat measures.



389

## 390 **Stimulus and Attention Classification**

### 391 ***Feature Matrix***

392 We assembled a dataset composed of neuronal firing rates recorded across the columnar  
393 arrays and across multiple experimental sessions (23 sessions from Monkey G; 20 sessions  
394 from Monkey B; 86 superficial neurons; 181 deep neurons) for all units for which we recorded a  
395 minimum number of trials per orientation (20), or attention condition (200). Each column of the  
396 feature matrix was a specific neuron's firing rate, and each row of that column was the neuron's  
397 firing rate on a specific trial. The rows of each column were aligned, so that they shared the  
398 same label for orientation or attention condition (depending on the epoch). The number of rows  
399 associated with each orientation or attention condition were matched, so that chance level was  
400 12.5% for the orientation epoch and 33% for the cue epoch. Each neuronal unit had multiple  
401 columns in the feature matrix, corresponding to the number of bins in which firing rates were  
402 calculated. The firing rates for the orientation and cue epochs were calculated in two 150ms  
403 time bins, from 50ms following stimulus onset to 350ms following stimulus onset. This provided  
404 a gross temporal pattern which was noted to improve performance in Nandy et al. (2016)<sup>24</sup>.  
405 When building feature matrices with variable population sizes, we randomly sampled a  
406 population that size from all available units. This process was repeated 100 times, generating a  
407 unique of feature matrix for each run of the decoder.

408

### 409 ***Random Forest Classification***

410 We used a Random Forest decoder, similar to that used in Nandy et al. (2016)<sup>24</sup>, as  
411 implemented by Matlabs (Mathworks TM) treebagger function. In addition to decoding based on  
412 firing rate, Random Forest can decode based on differences in firing rate variability, even when  
413 mean firing rates are equal<sup>52,53</sup>. Furthermore, rather than comparing each orientation to the  
414 others in turn, the decoder simultaneously considers all orientations. The decoder's decision

415 trees were trained on bags of trials (matrix rows), selected through bootstrapping with  
416 replacement, and tested each decision tree on trials not included in the training bag. This out-of-  
417 bag (OOB) error was used as the performance measure. It is significantly more conservative  
418 than cross validation, but has the advantage of using all available data when training the  
419 decoder. Furthermore, the bootstrapped sampling method has the traditional advantages  
420 associated with bootstrapping, such as revealing the true underlying distribution from the  
421 available training data, and reducing the impact of outlier trials<sup>53</sup>. The decoder then used a  
422 boosting method to create decision trees. At each branch point, a random subset of the features  
423 (square root of the total number of features) was chosen to calculate potential decision  
424 boundaries. Each of the features in the subset was used as a linear threshold for linearly  
425 partitioning the population of trials. The Gini impurity (GI) of the original sample, as well as of  
426 the two partitions was calculated using the formula:

$$GI = 1 - \sum_{i=1}^J p_i$$

427  
428 Where  $J$  is the number of classes, and  $p_i$  is the probability of choosing stimulus class  $i$  at  
429 random from the sample. The GI of the two partitions was averaged, and subtracted from the GI  
430 of the parent sample. The feature with the greatest decrease in GI was used at the decision  
431 boundary at that branch point. The use of a random subset of features reduces the influence of  
432 outlier features, allowing one to be less careful about the neurons selected for use in decoding.  
433 Stopping criteria for the decision trees was when either all the trials at a branch point had the  
434 same label ( $GI = 0$ ), or there were only 5 trials at the branch point. We set the number of trees  
435 to 500. The decoder was trained and tested using each of the 100 feature matrices, producing a  
436 distribution of decoder performance.

437 For visualization, we calculated the proximity matrix based on shared decision leaves,  
438 and plotted the first two principal components for each trial.

439

#### 440 ***Neuron-dropping Curves***

441 We used neuron-dropping curves to assess the performance of the decoder. Also known as  
442 learning-curves, these are a standard tool in the machine learning to assess whether  
443 performance limitations are due to the decoder, or to the quantity of data. When computing  
444 these functions, the quantity of data used for decoding is varied and an error rate (or  
445 performance level) is plotted as a function of that quantity. The presence of an asymptote  
446 indicates that the decoder has reached maximal performance, whereas the absence of an  
447 asymptote indicates more data is needed. We then fit a saturating function and compared both  
448 the rate of rise, and the asymptotic value between populations.

449 We created pseudo-populations, starting with 5 units, and then incrementing by 5 until  
450 the maximal number of available units was reached. For each population size, we randomly  
451 sampled the requisite number from the larger population with replacement, repeating this  
452 process 100 times to bootstrap a representative distribution. To this range of performance  
453 levels, we fit the saturating function,

$$454 \quad f(s) = a \times e^{(-b \times s)} + c,$$

455 where  $s$  is the size of the population,  $a$  controls the  $y$  intercept,  $b$  the slope and  $c$  specifies the  
456 function asymptote. This was implemented using the Matlab fit function with the method non-  
457 linear least squares. A confidence interval of 95% was derived from the fitting process.

458

459

460

## 461 Citations

462

463 1. Felleman, D. J. & Van Essen, D. C. Distributed hierarchical processing in the primate cerebral  
464 cortex. *Cereb. Cortex* **1**, 1–47 (1991).

465 2. Hilgetag, C. C., O’Neill, M. A. & Young, M. P. Indeterminate organization of the visual  
466 system. *Science* **271**, 776–777 (1996).

467 3. Zeki, S. The distribution of wavelength and orientation selective cells in different areas of  
468 monkey visual cortex. *Proc. R. Soc. Lond. B Biol. Sci.* **217**, 449–470 (1983).

469 4. Chang, M., Xian, S., Rubin, J. & Moore, T. Latency of chromatic information in area V4. *J.*  
470 *Physiol. Paris* **108**, 11–17 (2014).

471 5. Desimone, R. & Schein, S. J. Visual properties of neurons in area V4 of the macaque:  
472 sensitivity to stimulus form. *J. Neurophysiol.* **57**, 835–868 (1987).

473 6. Roe, A. W. *et al.* Toward a unified theory of visual area V4. *Neuron* **74**, 12–29 (2012).

474 7. Pasupathy, A. & Connor, C. E. Responses to contour features in macaque area V4. *J.*  
475 *Neurophysiol.* **82**, 2490–2502 (1999).

476 8. Yau, J. M., Pasupathy, A., Brincat, S. L. & Connor, C. E. Curvature Processing Dynamics in  
477 Macaque Area V4. *Cereb. Cortex* **23**, 198–209 (2013).

478 9. Tanigawa, H., Lu, H. D. & Roe, A. W. Functional organization for color and orientation in  
479 macaque V4. *Nat. Neurosci.* **13**, 1542–1548 (2010).

480 10. Motter, B. C. Focal attention produces spatially selective processing in visual cortical areas  
481 V1, V2, and V4 in the presence of competing stimuli. *J. Neurophysiol.* **70**, 909–919 (1993).

- 482 11. Baruni, J. K., Lau, B. & Salzman, C. D. Reward expectation differentially modulates  
483 attentional behavior and activity in visual area V4. *Nat. Neurosci.* **18**, 1656–1663 (2015).
- 484 12. Steinmetz, N. A. & Moore, T. Eye movement preparation modulates neuronal responses in  
485 area V4 when dissociated from attentional demands. *Neuron* **83**, 496–506 (2014).
- 486 13. Tolias, A. S. *et al.* Eye Movements Modulate Visual Receptive Fields of V4 Neurons. *Neuron*  
487 **29**, 757–767 (2001).
- 488 14. Bichot, N. P., Rossi, A. F. & Desimone, R. Parallel and Serial Neural Mechanisms for Visual  
489 Search in Macaque Area V4. *Science* **308**, 529–534 (2005).
- 490 15. Ungerleider, L. G., Galkin, T. W., Desimone, R. & Gattass, R. Cortical Connections of Area V4  
491 in the Macaque. *Cereb. Cortex* **18**, 477–499 (2008).
- 492 16. Yukie, M. & Iwai, E. Laminar origin of direct projection from cortex area V1 to V4 in the  
493 rhesus monkey. *Brain Res.* **346**, 383–386 (1985).
- 494 17. Nakamura, H., Gattass, R., Desimone, R. & Ungerleider, L. G. The modular organization of  
495 projections from areas V1 and V2 to areas V4 and TEO in macaques. *J. Neurosci.* **13**, 3681–  
496 3691 (1993).
- 497 18. Markov, N. T. *et al.* Anatomy of hierarchy: feedforward and feedback pathways in macaque  
498 visual cortex. *J. Comp. Neurol.* **522**, 225–259 (2014).
- 499 19. Leichnetz, G. R., Spencer, R. F., Hardy, S. G. P. & Astruc, J. The prefrontal corticotectal  
500 projection in the monkey; An anterograde and retrograde horseradish peroxidase study.  
501 *Neuroscience* **6**, 1023–1041 (1981).

- 502 20. Gilbert, C. D. & Wiesel, T. N. Functional Organization of the Visual Cortex. in *Progress in*  
503 *Brain Research* (eds. Changeux, J.-P., Glowinski, J., Imbert, M. & Bloom, F. E.) **58**, 209–218  
504 (Elsevier, 1983).
- 505 21. Buffalo, E. A., Fries, P., Landman, R., Buschman, T. J. & Desimone, R. Laminar differences in  
506 gamma and alpha coherence in the ventral stream. *Proc. Natl. Acad. Sci. U. S. A.* **108**,  
507 11262–11267 (2011).
- 508 22. Nandy, A. S., Nassi, J. J. & Reynolds, J. H. Laminar organization of attentional modulation in  
509 macaque visual area V4. *Neuron* **93**, 235–246 (2017).
- 510 23. Simons, D. J. & Rensink, R. A. Change blindness: past, present, and future. *Trends Cogn. Sci.*  
511 **9**, 16–20 (2005).
- 512 24. Nandy, A. S., Mitchell, J. F., Jadi, M. P. & Reynolds, J. H. Neurons in Macaque Area V4 Are  
513 Tuned for Complex Spatio-Temporal Patterns. *Neuron* **91**, 920–930 (2016).
- 514 25. Lebedev, M. A. How to read neuron-dropping curves? *Front. Syst. Neurosci.* **8**, (2014).
- 515 26. Bonhoeffer, T. & Grinvald, A. The layout of iso-orientation domains in area 18 of cat visual  
516 cortex: optical imaging reveals a pinwheel-like organization. *J. Neurosci.* **13**, 4157–4180  
517 (1993).
- 518 27. Fujita, I. & Fujita, T. Intrinsic connections in the macaque inferior temporal cortex. *J. Comp.*  
519 *Neurol.* **368**, 467–486
- 520 28. Pasupathy, A. & Connor, C. E. Shape Representation in Area V4: Position-Specific Tuning for  
521 Boundary Conformation. *J. Neurophysiol.* **86**, 2505–2519 (2001).
- 522 29. Kosai, Y., El-Shamayleh, Y., Fyall, A. M. & Pasupathy, A. The Role of Visual Area V4 in the  
523 Discrimination of Partially Occluded Shapes. *J. Neurosci.* **34**, 8570–8584 (2014).

- 524 30. Moore, T., Tolias, A. S. & Schiller, P. H. Visual representations during saccadic eye  
525 movements. *Proc. Natl. Acad. Sci.* **95**, 8981–8984 (1998).
- 526 31. Sheinberg, D. L. & Logothetis, N. K. Noticing Familiar Objects in Real World Scenes: The Role  
527 of Temporal Cortical Neurons in Natural Vision. *J. Neurosci.* **21**, 1340–1350 (2001).
- 528 32. Reppas, J. B., Usrey, W. M. & Reid, R. C. Saccadic Eye Movements Modulate Visual  
529 Responses in the Lateral Geniculate Nucleus. *Neuron* **35**, 961–974 (2002).
- 530 33. Bosman, C. A., Womelsdorf, T., Desimone, R. & Fries, P. A Microsaccadic Rhythm Modulates  
531 Gamma-Band Synchronization and Behavior. *J. Neurosci.* **29**, 9471–9480 (2009).
- 532 34. Moore, T., Armstrong, K. M. & Fallah, M. Visuomotor origins of covert spatial attention.  
533 *Neuron* **40**, 671–683 (2003).
- 534 35. Moore, T. Shape Representations and Visual Guidance of Saccadic Eye Movements. *Science*  
535 **285**, 1914–1917 (1999).
- 536 36. Schafer, R. J. & Moore, T. Attention Governs Action in the Primate Frontal Eye Field. *Neuron*  
537 **56**, 541–551 (2007).
- 538 37. Fries, W. Cortical projections to the superior colliculus in the macaque monkey: A  
539 retrograde study using horseradish peroxidase. *J. Comp. Neurol.* **230**, 55–76
- 540 38. Gattass, R., Sousa, A. P. & Gross, C. G. Visuotopic organization and extent of V3 and V4 of  
541 the macaque. *J. Neurosci.* **8**, 1831–1845 (1988).
- 542 39. Kalwani, R. M., Bloy, L., Elliott, M. A. & Gold, J. I. A method for localizing microelectrode  
543 trajectories in the macaque brain using MRI. *J. Neurosci. Methods* **176**, 104–111 (2009).
- 544 40. Pettersen, K. H., Devor, A., Ulbert, I., Dale, A. M. & Einevoll, G. T. Current-source density  
545 estimation based on inversion of electrostatic forward solution: Effects of finite extent of

- 546 neuronal activity and conductivity discontinuities. *J. Neurosci. Methods* **154**, 116–133  
547 (2006).
- 548 41. Hansen, B. J. & Dragoi, V. Adaptation-induced synchronization in laminar cortical circuits.  
549 *Proc. Natl. Acad. Sci.* **108**, 10720–10725 (2011).
- 550 42. Schroeder, C. E., Mehta, A. D. & Givre, S. J. A spatiotemporal profile of visual system  
551 activation revealed by current source density analysis in the awake macaque. *Cereb. Cortex*  
552 **8**, 575–592 (1998).
- 553 43. Swadlow, H. A., Gusev, A. G. & Bezdudnaya, T. Activation of a Cortical Column by a  
554 Thalamocortical Impulse. *J. Neurosci.* **22**, 7766–7773 (2002).
- 555 44. Chen, C.-M. *et al.* Functional Anatomy and Interaction of Fast and Slow Visual Pathways in  
556 Macaque Monkeys. *Cereb. Cortex* **17**, 1561–1569 (2007).
- 557 45. Guillery, R. W. & Sherman, S. M. Thalamic Relay Functions and Their Role in Corticocortical  
558 Communication: Generalizations from the Visual System. *Neuron* **33**, 163–175 (2002).
- 559 46. Shipp, S. The functional logic of cortico–pulvinar connections. *Philos. Trans. R. Soc. Lond. B*  
560 *Biol. Sci.* **358**, 1605–1624 (2003).
- 561 47. Edward G. Jones. *The thalamus*. (Springer Science+Business Media, LLC, Plenum Press,  
562 1985).
- 563 48. Bollimunta, A., Chen, Y., Schroeder, C. E. & Ding, M. Neuronal Mechanisms of Cortical Alpha  
564 Oscillations in Awake-Behaving Macaques. *J. Neurosci.* **28**, 9976–9988 (2008).
- 565 49. Givre, S. J., Schroeder, C. E. & Arezzo, J. C. Contribution of extrastriate area V4 to the  
566 surface-recorded flash VEP in the awake macaque. *Vision Res.* **34**, 415–428 (1994).



- 567 50. Trongnetrpunya, A. *et al.* Assessing Granger Causality in Electrophysiological Data:  
568 Removing the Adverse Effects of Common Signals via Bipolar Derivations. *Front. Syst.*  
569 *Neurosci.* **9**, (2016).
- 570 51. Pinherio, J., Bates, D., DebRoy, S. & Sarkar, D. *nlme: Linear and Nonlinear Mixed Effects*  
571 *Models.* (2018).
- 572 52. Strobl, C., Malley, J. & Tutz, G. An introduction to recursive partitioning: rationale,  
573 application, and characteristics of classification and regression trees, bagging, and random  
574 forests. *Psychol. Methods* **14**, 323 (2009).
- 575 53. Ho, T. K. A Data Complexity Analysis of Comparative Advantages of Decision Forest  
576 Constructors. *Pattern Anal. Appl.* **5**, 102–112 (2002).
- 577
- 578

579 **Figure 1. Behavioral task and perpendicular recordings in area V4.** A) Panels depict phases of  
580 the attention task, and lower left dashed circle denote RF position of recorded neurons, and  
581 was not seen by subjects. Receptive fields of recorded neurons was always in the lower left, as  
582 indicated by the dashed circle outline. Task began with fixation at a central fixation point.  
583 Following fixation, randomly oriented Gabor gratings appeared at four positions. After an  
584 additional period, a cue (white diagonal line) appeared near the fixation point and indicated  
585 which grating was the target. A blank period followed in which the gratings disappeared, and  
586 then the stimuli reappeared on the screen with the target presented either at the same  
587 orientation or at a new orientation. Monkeys were rewarded for making saccadic eye  
588 movements to the stimulus opposite the changed target (arrow) or for maintaining fixation  
589 when the orientation did not change. B) Colored contours and corresponding dots respectively  
590 show the RF borders and RF centers mapped at electrode channels across difference cortical  
591 depths for an example V4 recording. C) Example current source density (CSD) with alignment  
592 feature for the two monkey subjects. The delineation between superficial and deep layers is  
593 indicated by the gray line.

594

595

596 **Figure 2. Orientation tuning in superficial and deep layers of area V4.** A) Left, distribution of  
597 tuned units (red) among total units recorded (black) across cortical depth, relative to the  
598 superficial/deep CSD border. Right, the same data plotted as a proportion. B) Average Gaussian  
599 tuning fits, and definitions of fit parameters, for superficial (green) and deep (blue) neurons.  
600 Line thicknesses denote  $\pm$ SEM. C) Left, performance of a Random Forest classifier at decoding

601 stimulus orientation across different population sizes of superficial (green) and deep blue)  
602 neurons, along with shuffled controls for both (red and purple). Points indicate median values,  
603 and bars indicate the SEM for the 100 decoder cycles at each size. Solid lines indicate the fit  
604 saturating function. Right, multidimensional scaling (MDS) of classification for one cycle at the  
605 maximum population size (210 neurons). Each color/shape combination is associated with a  
606 unique orientation. Inset depicts the same MDS analysis after shuffling stimulus orientation  
607 labels.

608

609 **Figure 3 Behavioral modulation in superficial and deep layers of V4.** A) Modulation indices  
610 across cortical depth. Individual medians and SEMs are plotted at each depth for covert  
611 attention (yellow) and saccade preparation (red), along with the total number of units recorded  
612 (grey). Depths with fewer than five neurons were removed. B) Performance of Random Forest  
613 decoder at distinguishing between the three behavioral conditions (covert attention, saccade  
614 preparation or control) from superficial and deep neurons, as a function of neuronal population  
615 size. C) Performance of the decoder at distinguishing between pairs of conditions: (top) saccade  
616 preparation from control; (middle) saccade preparation from covert attention; (bottom) covert  
617 attention from control.

618

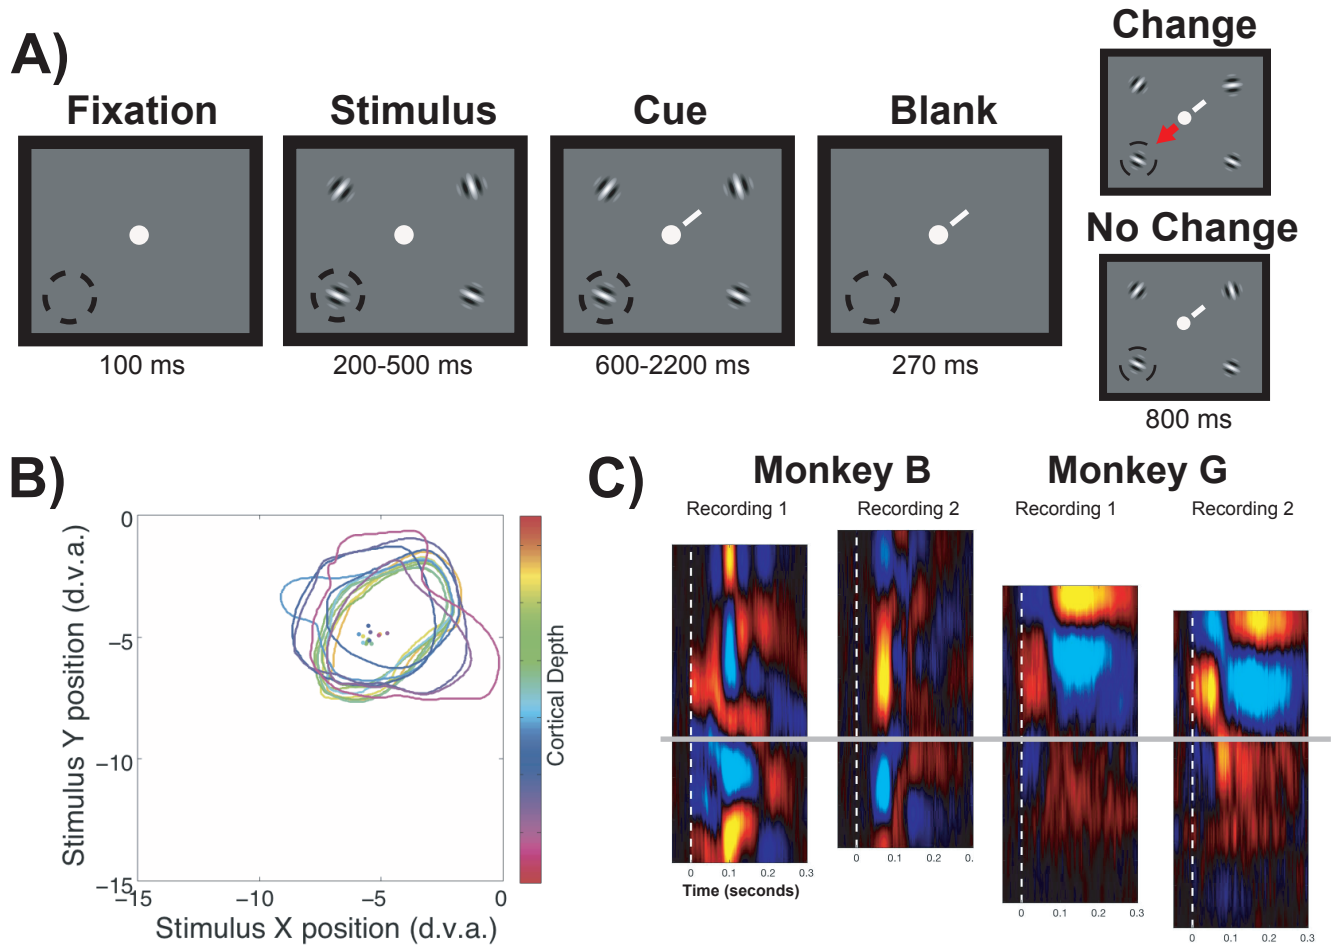

**Figure 1**  
Pettine, Steinmetz and Moore

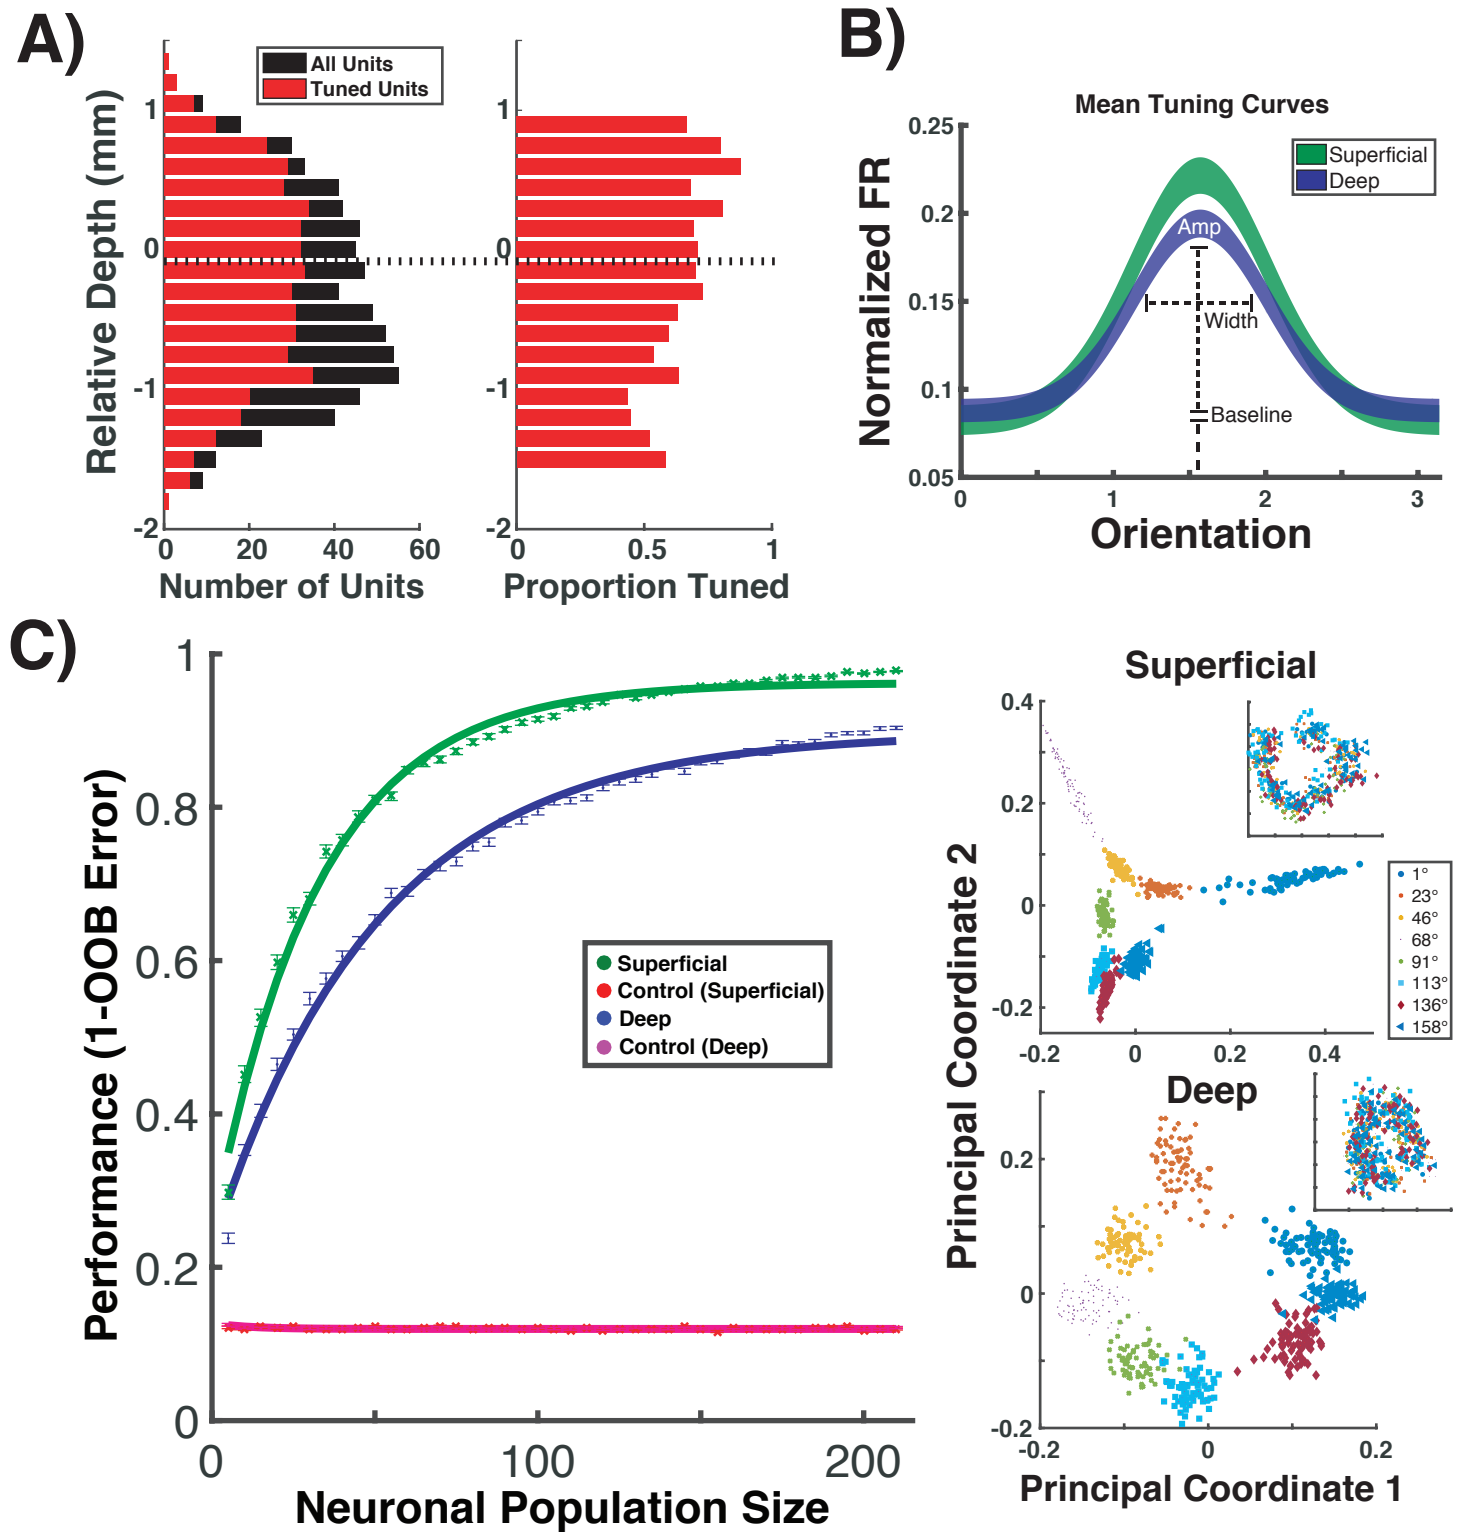

**Figure 2**

Pettine, Steinmetz and Moore

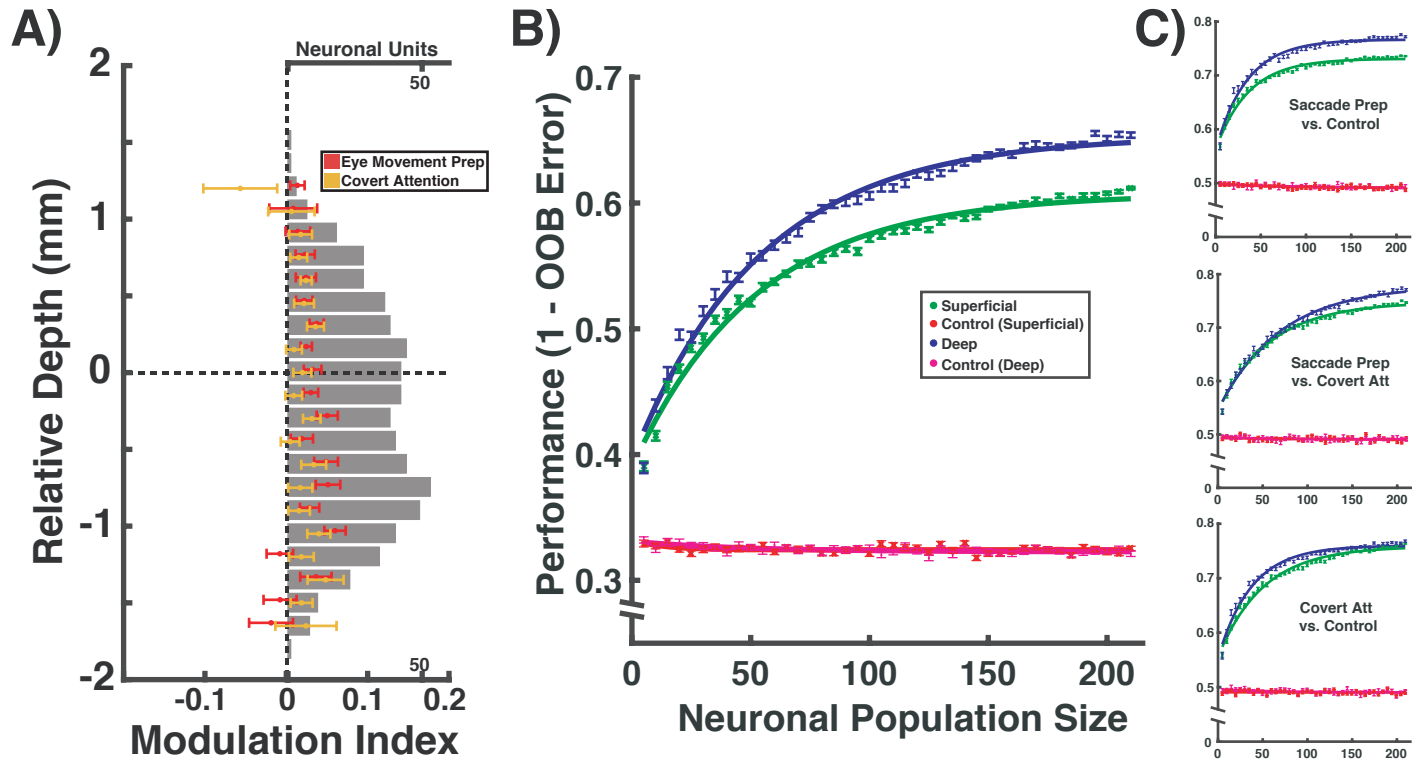

**Figure 3**  
Pettine, Steinmetz and Moore
